# Supplementary material
Source: PubMed Central journal article supplement (PMC8455450)
Supplement: NIHMS1733916-supplement-Supplemental_Material.pdf [file NIHMS1733916-supplement-Supplemental_Material.pdf]

# Requesting access to the INTERMACS-imputation-ML analysis on the Precision Medicine Platform

Step 1: Sign in to precision.heart.org

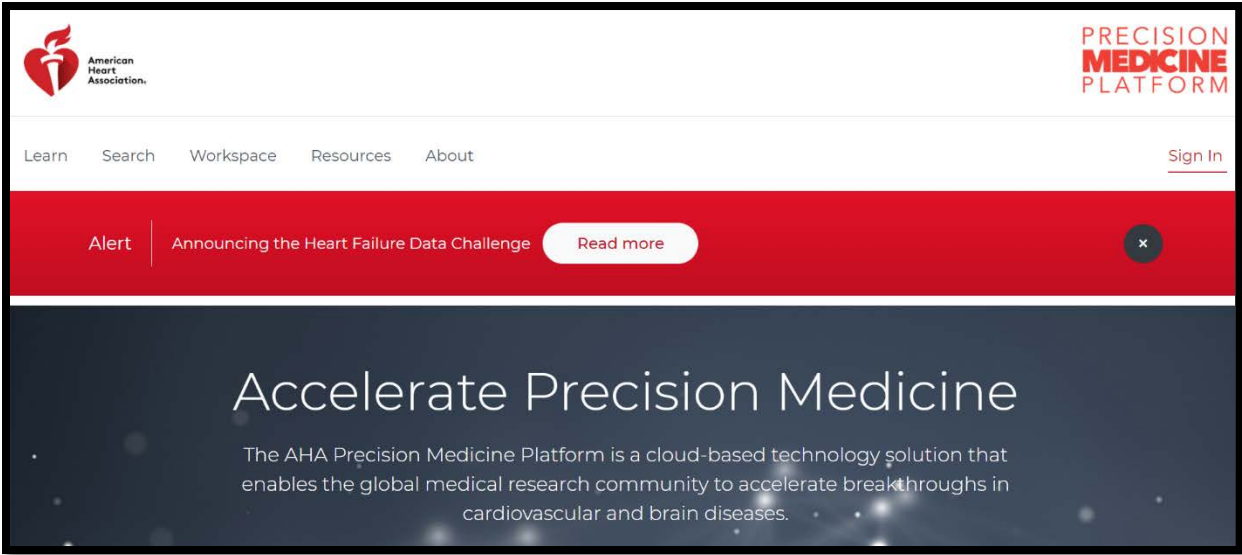

Step 2: Enter your login credentials or click Register to create an account.

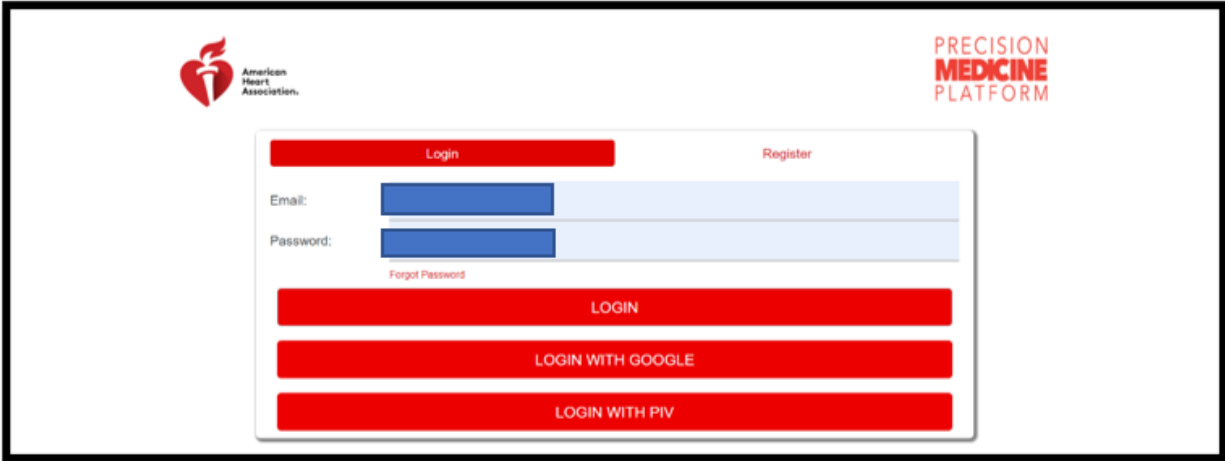

### Step 3: Go to the 'Search' page

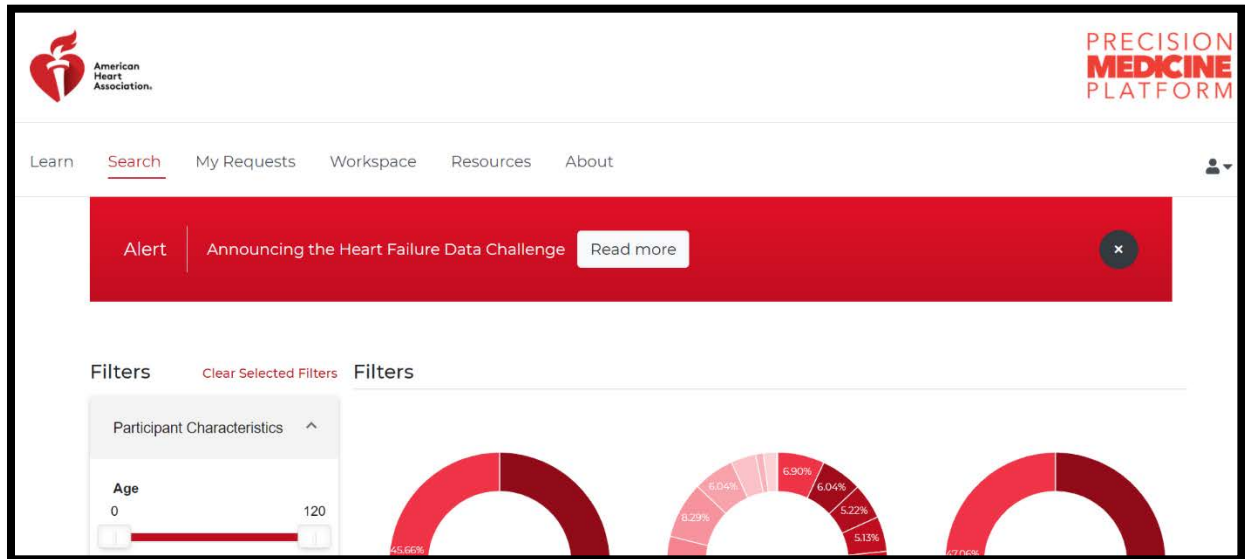

### Step 4: Request Access to INTERMACS-imputation-ML

1. Scroll down the page and select the check box next to INTERMACS-imputation-ML in the datasets list.
2. Click on 'Request Data Access'.

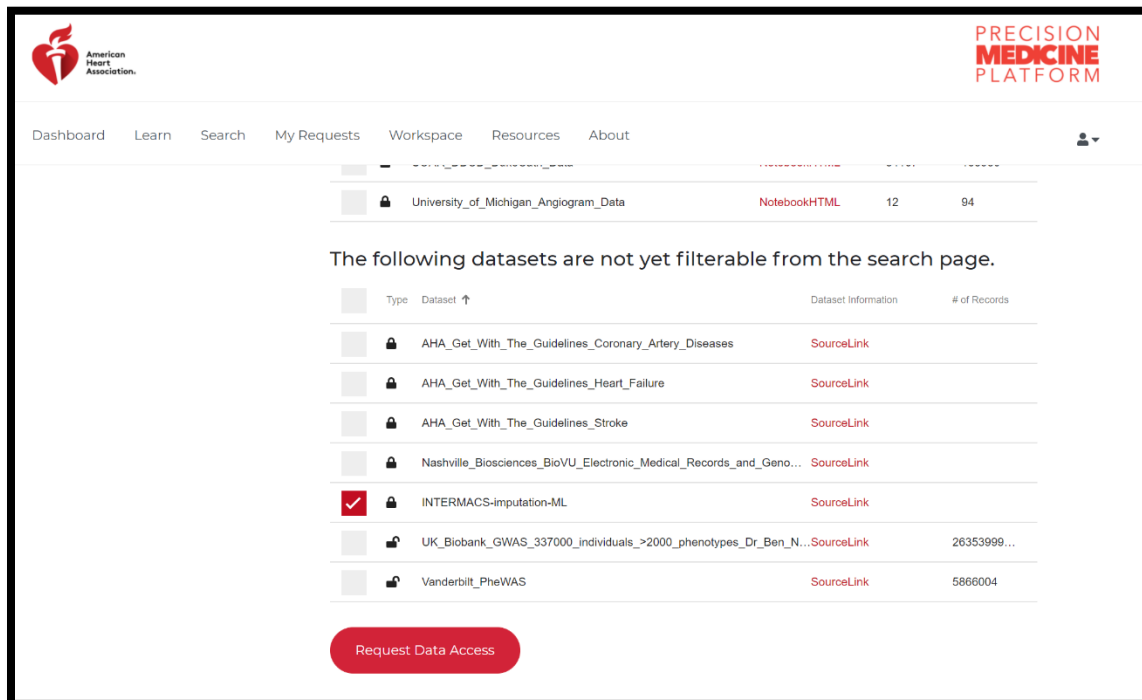

Step 5: Fill in the questionnaire in the request form. Select 'Create a new Workspace'. Please note that since this information is required for our standard request process you are being asked to fill out the information, however not all of it is applicable for this use case.

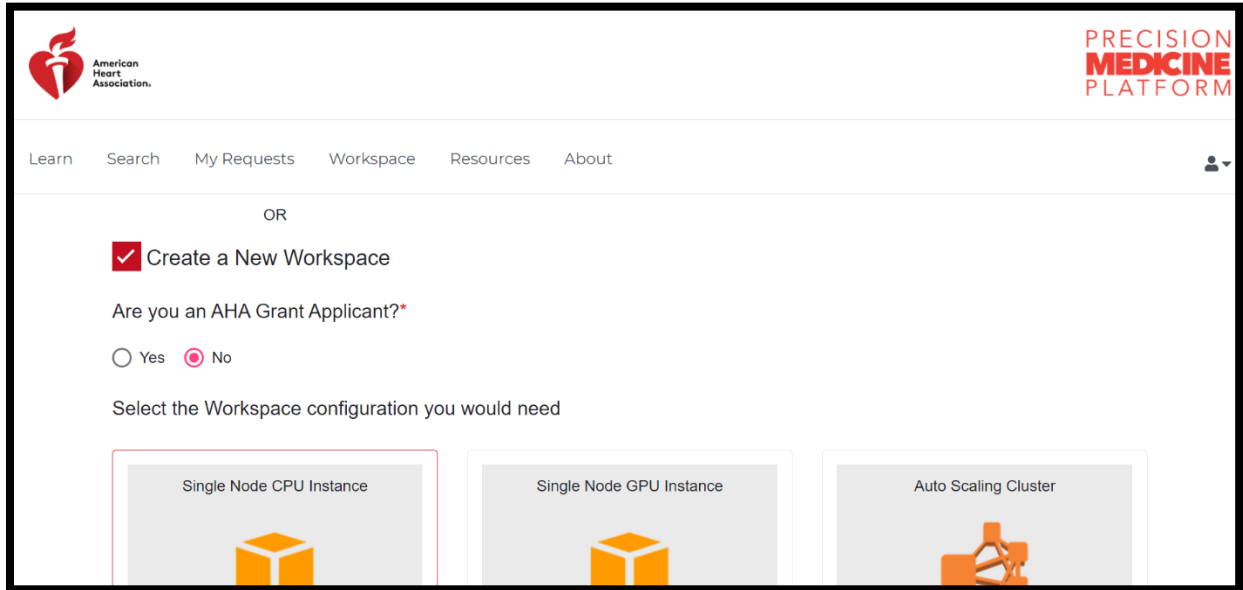

The screenshot shows the workspace configuration form on the Precision Medicine Platform. At the top left is the American Heart Association logo, and at the top right is the 'PRECISION MEDICINE PLATFORM' logo. Below the navigation bar (Learn, Search, My Requests, Workspace, Resources, About) is a section with the heading 'OR' and a checked checkbox for 'Create a New Workspace'. Below this is the question 'Are you an AHA Grant Applicant?' with radio buttons for 'Yes' and 'No' (selected). The main section is titled 'Select the Workspace configuration you would need' and contains three options: 'Single Node CPU Instance' (highlighted with a red border), 'Single Node GPU Instance', and 'Auto Scaling Cluster'. Each option has a corresponding icon below it.

Step 6: Select the configuration of the workspace as Single Node. Again, this just needs to be selected to move through the request process.

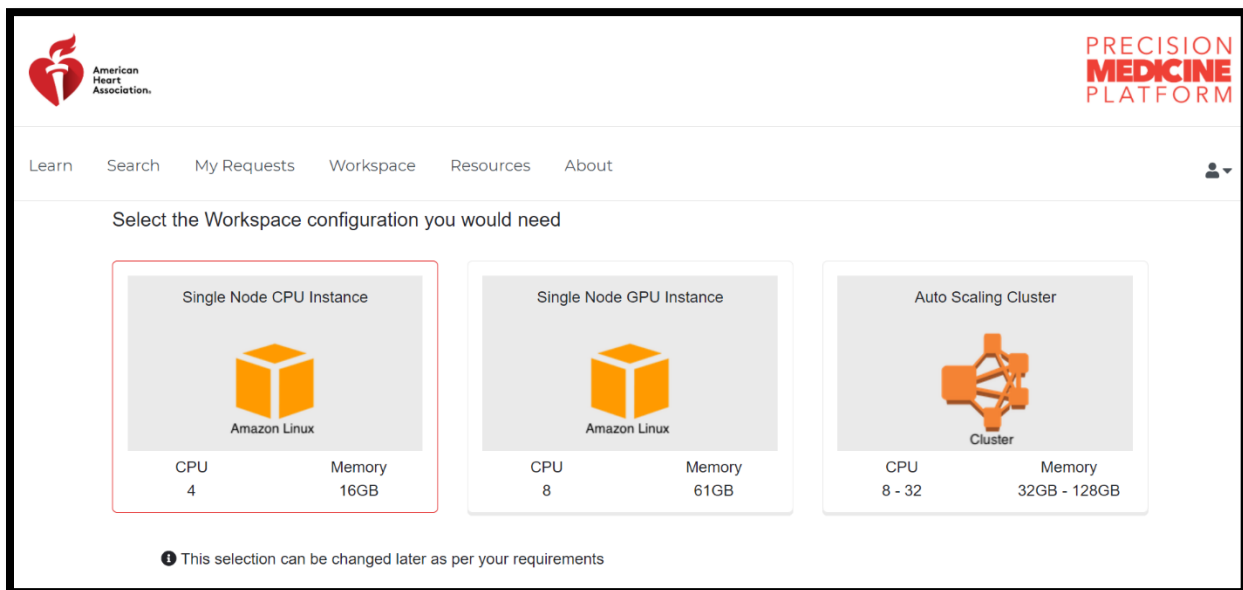

This screenshot shows the same workspace configuration form as Step 5, but with more detailed information for each configuration option. The 'Single Node CPU Instance' is still highlighted with a red border. Below the icons, the specifications are listed: 'Single Node CPU Instance' (Amazon Linux) with CPU 4 and Memory 16GB; 'Single Node GPU Instance' (Amazon Linux) with CPU 8 and Memory 61GB; and 'Auto Scaling Cluster' (Cluster) with CPU 8 - 32 and Memory 32GB - 128GB. At the bottom, a note states: 'This selection can be changed later as per your requirements'.

Step 7: Leave this selection at zero (0).

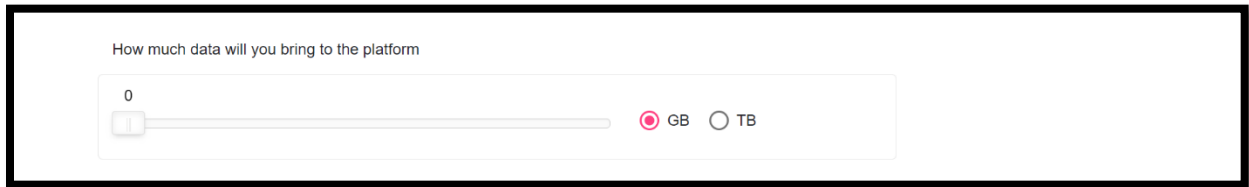

How much data will you bring to the platform

0

GB  TB

A horizontal slider control is shown with a small square handle at the far left end, indicating a value of 0. To the right of the slider are two radio buttons: the first is selected and labeled 'GB', and the second is unselected and labeled 'TB'.

Step 8: Acknowledge the following items. *Please note there is no cost associated with your access to the INTERMACS dataset.*

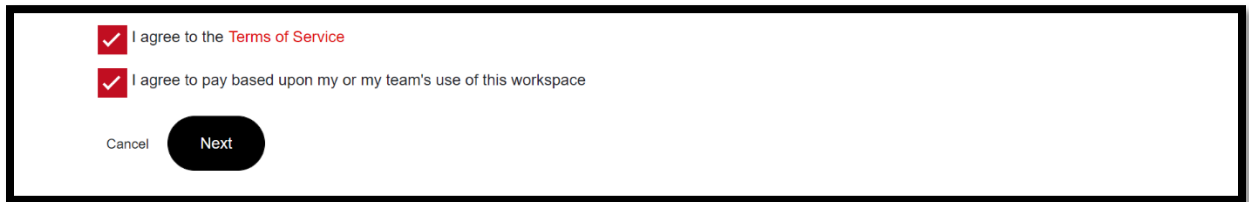

I agree to the [Terms of Service](#)

I agree to pay based upon my or my team's use of this workspace

Cancel **Next**

Two lines of text, each preceded by a red checkmark in a square box. Below the text are two buttons: a plain 'Cancel' button and a dark, rounded 'Next' button.

Step 9: In the research use statement, enter "INTERMACS-imputation-ML". *Fill out the rest of the fields in a generic way to complete the form.*

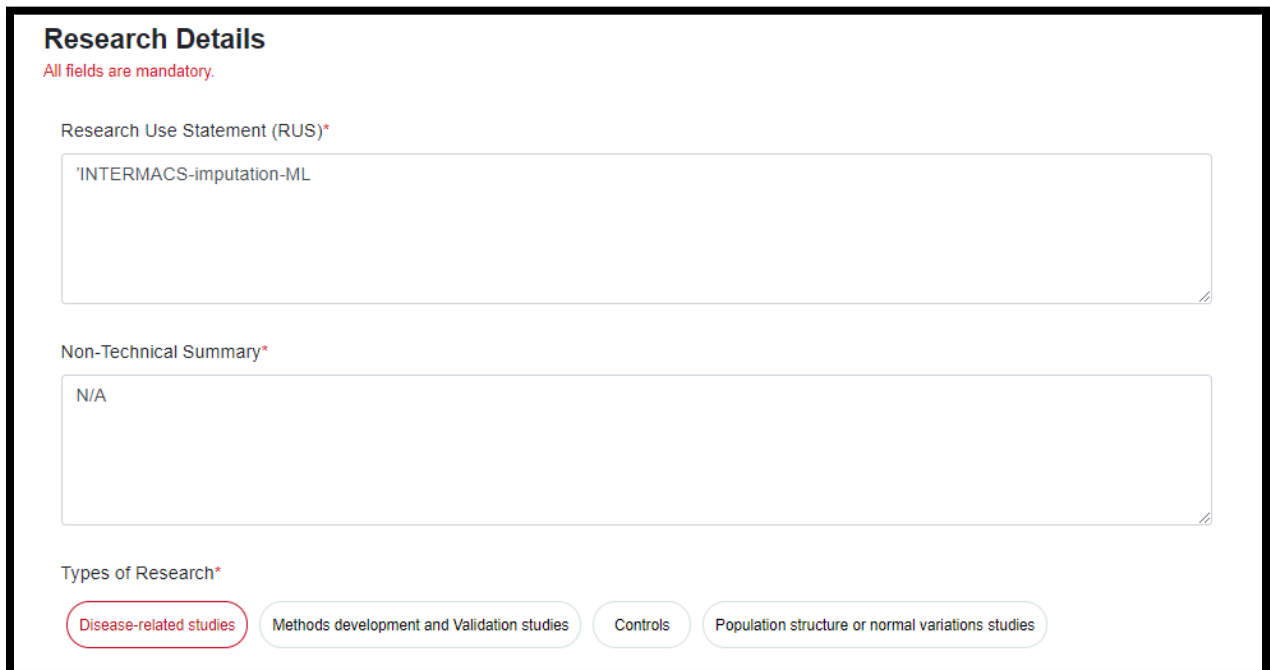

**Research Details**

All fields are mandatory.

Research Use Statement (RUS)\*

INTERMACS-imputation-ML

Non-Technical Summary\*

N/A

Types of Research\*

Disease-related studies  Methods development and Validation studies  Controls  Population structure or normal variations studies

The form is titled 'Research Details' and includes a note that all fields are mandatory. It contains three main sections: 'Research Use Statement (RUS)\*' with a text box containing 'INTERMACS-imputation-ML'; 'Non-Technical Summary\*' with a text box containing 'N/A'; and 'Types of Research\*' with four radio button options. The first option, 'Disease-related studies', is selected.

Step 10: Enter billing information so that we have your contact information, there is no charge for access to this dataset.

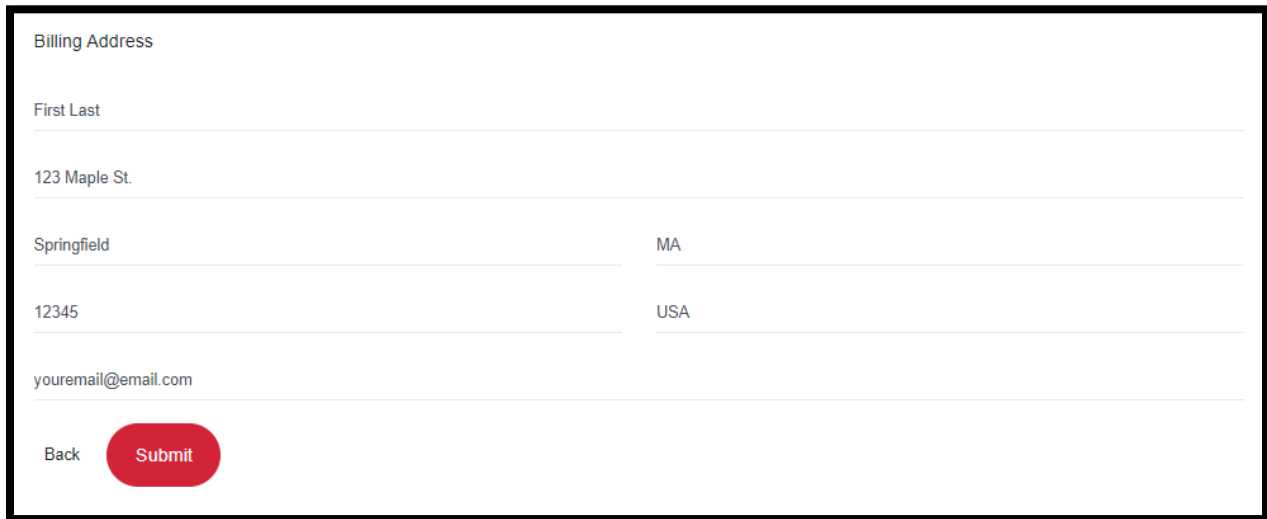

A form titled "Billing Address" with the following fields and values:

- First Last
- 123 Maple St.
- Springfield MA
- 12345 USA
- youremail@email.com

At the bottom left, there is a "Back" link and a red "Submit" button.

Step 11: It may take up to 24 hours for your request to be approved. Once done, you will receive a confirmation email. To launch the workspace, login to the PMP, and under 'Workspaces' you will see the INTERMACS-imputation-ML workspace, along with a list of authorized users. To launch the workspace, click on 'Launch Workspace'.

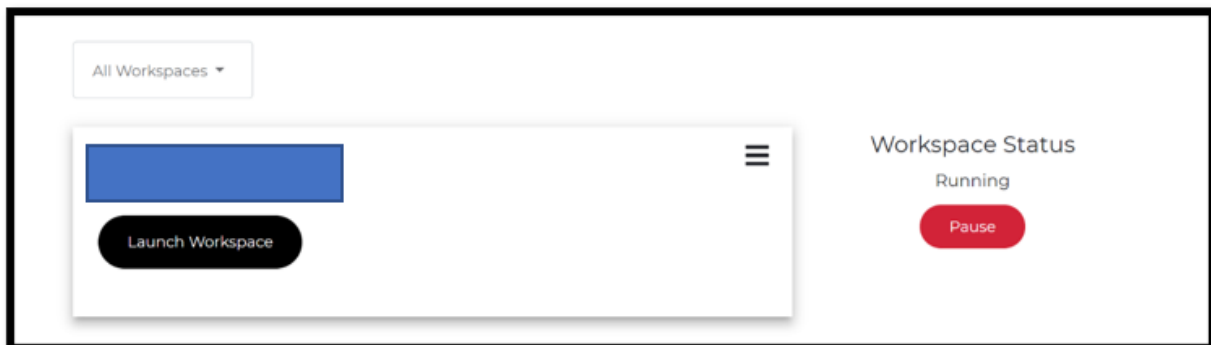

The interface shows a workspace management section. At the top left, there is a dropdown menu labeled "All Workspaces". Below it, a card displays a blue placeholder box and a black "Launch Workspace" button. To the right, the "Workspace Status" is shown as "Running", with a red "Pause" button below it.

Step 12: If a workspace has been idle for some time (about a week), it goes into a paused state. To resume the workspace, just click on 'Resume' under 'Workspace Status'. This restarts the workspace and may take about 10 minutes. While resuming, you may configure other settings related to the workspace as well.

Step 13: Once launched, this is what the workspace will look like. By default, the environment launches with Jupyter, RStudio and Jupyter Lab.

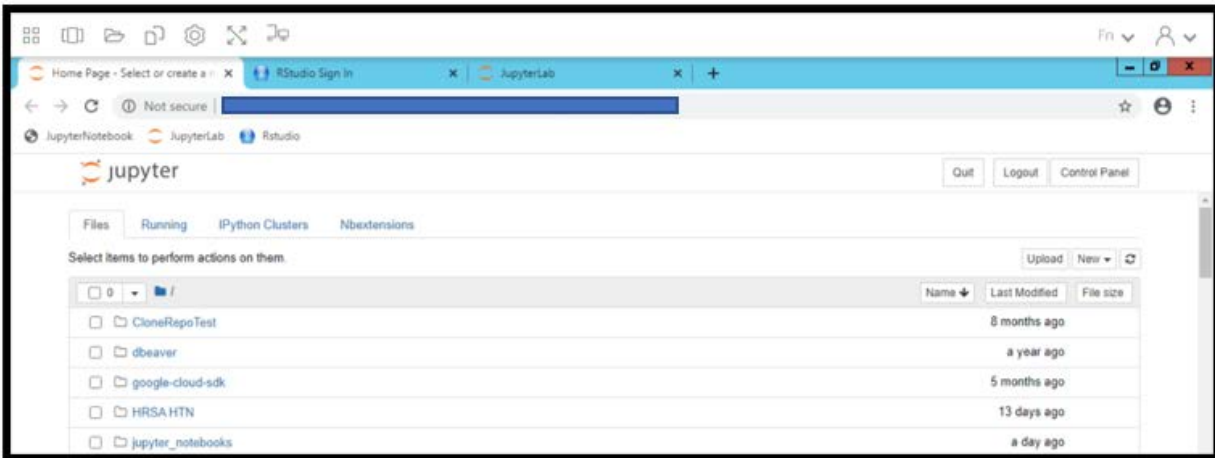

Step 14: You can upload notebooks into the workspace via the PMP by using the interface in the workspace section, below the 'Launch Workspace' button. Any files you upload will be present in the 'My\_Notebooks' folder in the workspace.

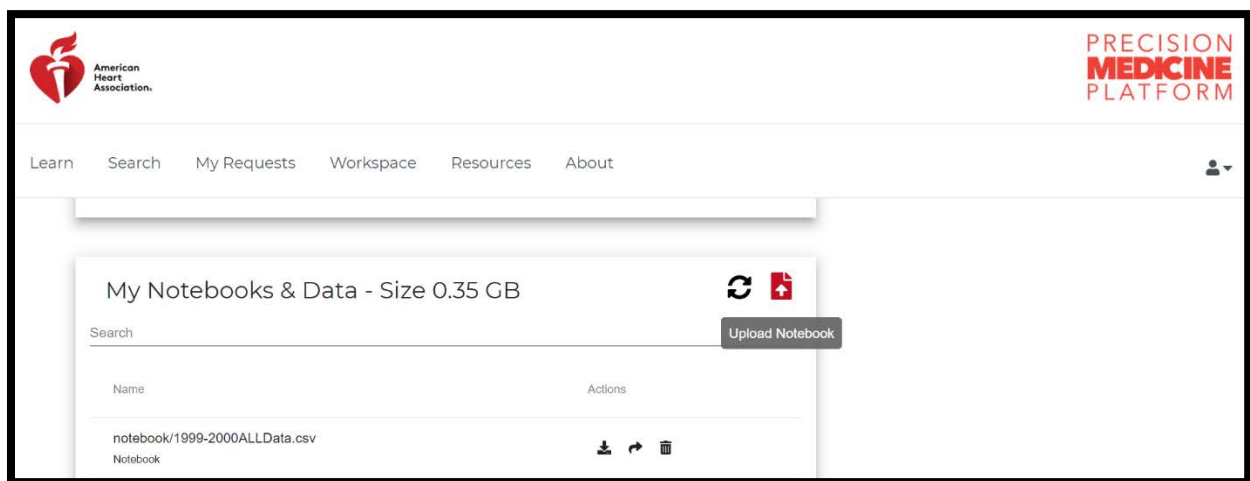

### Upload Notebook

Single File  Multiple Files

Notebook  Researcher Data

Name your file

Choose file

**i** Do not upload any data that contains PII or PHI information.

**i** For uploading large files(>20GB), please request **SFTP - Large File Upload Service** from the My Requests page.

Cancel

Upload

### My Notebooks & Data -

Search

Name

notebook/1999-2000ALLData.csv  
Notebook

notebook/American Heart Association Surve  
Notebook

notebook/COVID-19, Women, and Worry.pd  
Notebook
